# Supplementary material
Source: ML conference proceedings conference paper supplement (https://aclanthology.org/2025.bionlp-1.28)
Supplement: SupplementaryMaterial [file Prompt.pdf › figs/Prompt.pdf]

## Prompt

You are an expert in the {domain} domain.

First entity: {entity1} of type {entity\_type1}.

- {entity\_type1} is defined as {entity\_type1\_description}.
- Mark this entity between <{entity\_type1}> and </{entity\_type1}> tags.

2. Second entity: {entity2} of type {entity\_type2}.

- {entity\_type2} is defined as {entity\_type2\_description}.
- Mark this entity between <{entity\_type2}> and </{entity\_type2}> tags.

...

Give the output between <start\_sentence> and </end\_sentence>.
