# Supplementary material
Source: ML conference proceedings conference paper supplement (https://aclanthology.org/2025.bionlp-1.28)
Supplement: SupplementaryMaterial [file Prompt_Example.pdf › figs/Prompt_Example.pdf]

## Input

You are an expert in the **biomedical** domain.

Generate a sentence that includes the following entities and their types.

First entity is “aspirin” of type “Chemical”.

A chemical is a substance with a distinct molecular composition that is produced by or used in a chemical process.

Mark this entity between <Chemical> and </Chemical> tags.

Second entity is “flu” of type <Disease>.

A disease is a condition that impairs normal functioning and is typically characterized by specific symptoms.

Mark this entity between <Disease> and </Disease> tags.

Give the output between <start\_sentence> and </end\_sentence>.

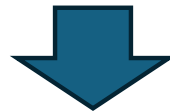

## LLM Output

{<start\_sentence> Taking <Chemical>aspirin</Chemical> can help alleviate symptoms of <Disease>flu</Disease>. </end\_sentence>
