# Supplementary material
Source: ML conference proceedings conference paper supplement (https://aclanthology.org/2025.bionlp-1.28)

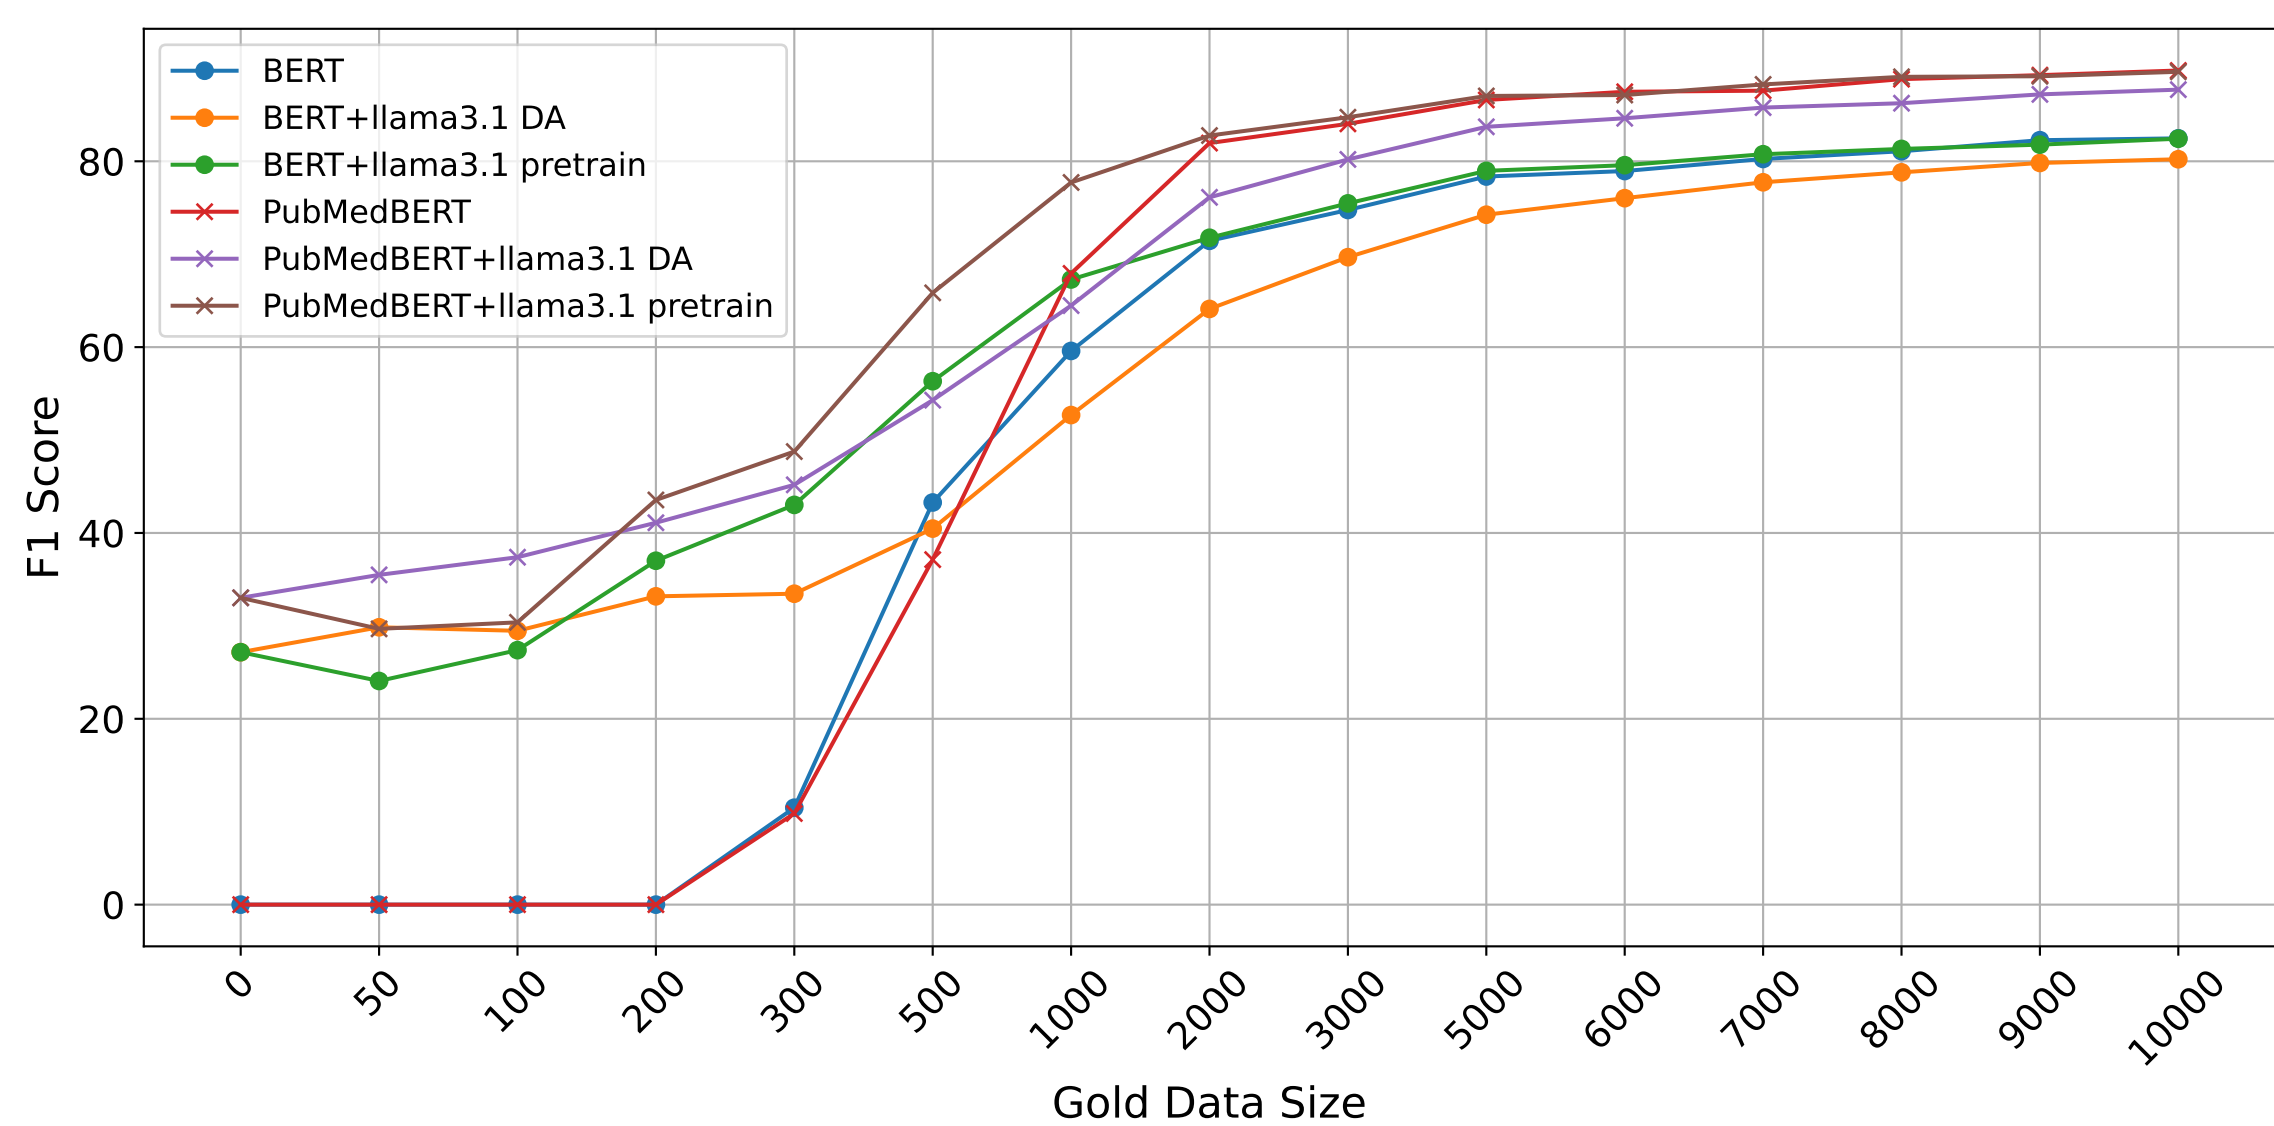

Supplement: SupplementaryMaterial [file BC4CHEMD_f1_scores_plot.pdf › figs/BC4CHEMD_f1_scores_plot.pdf]

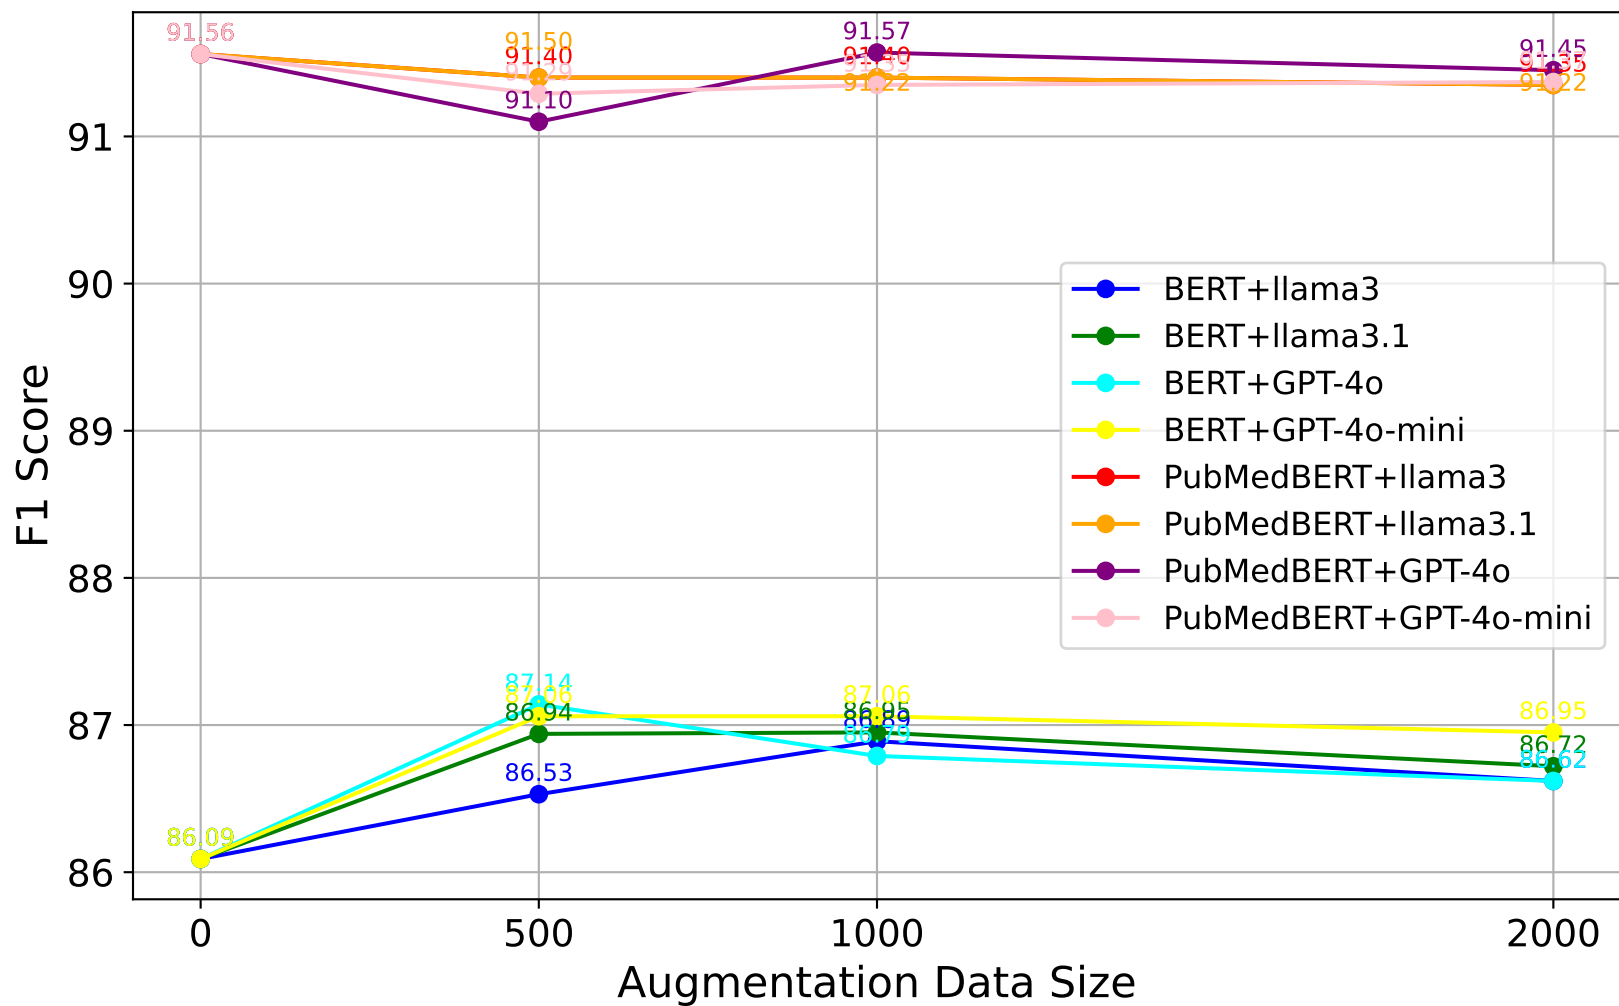

Supplement: SupplementaryMaterial [file BC4CHEMD_fulldata_f1_scores_plot.pdf › figs/BC4CHEMD_fulldata_f1_scores_plot.pdf]

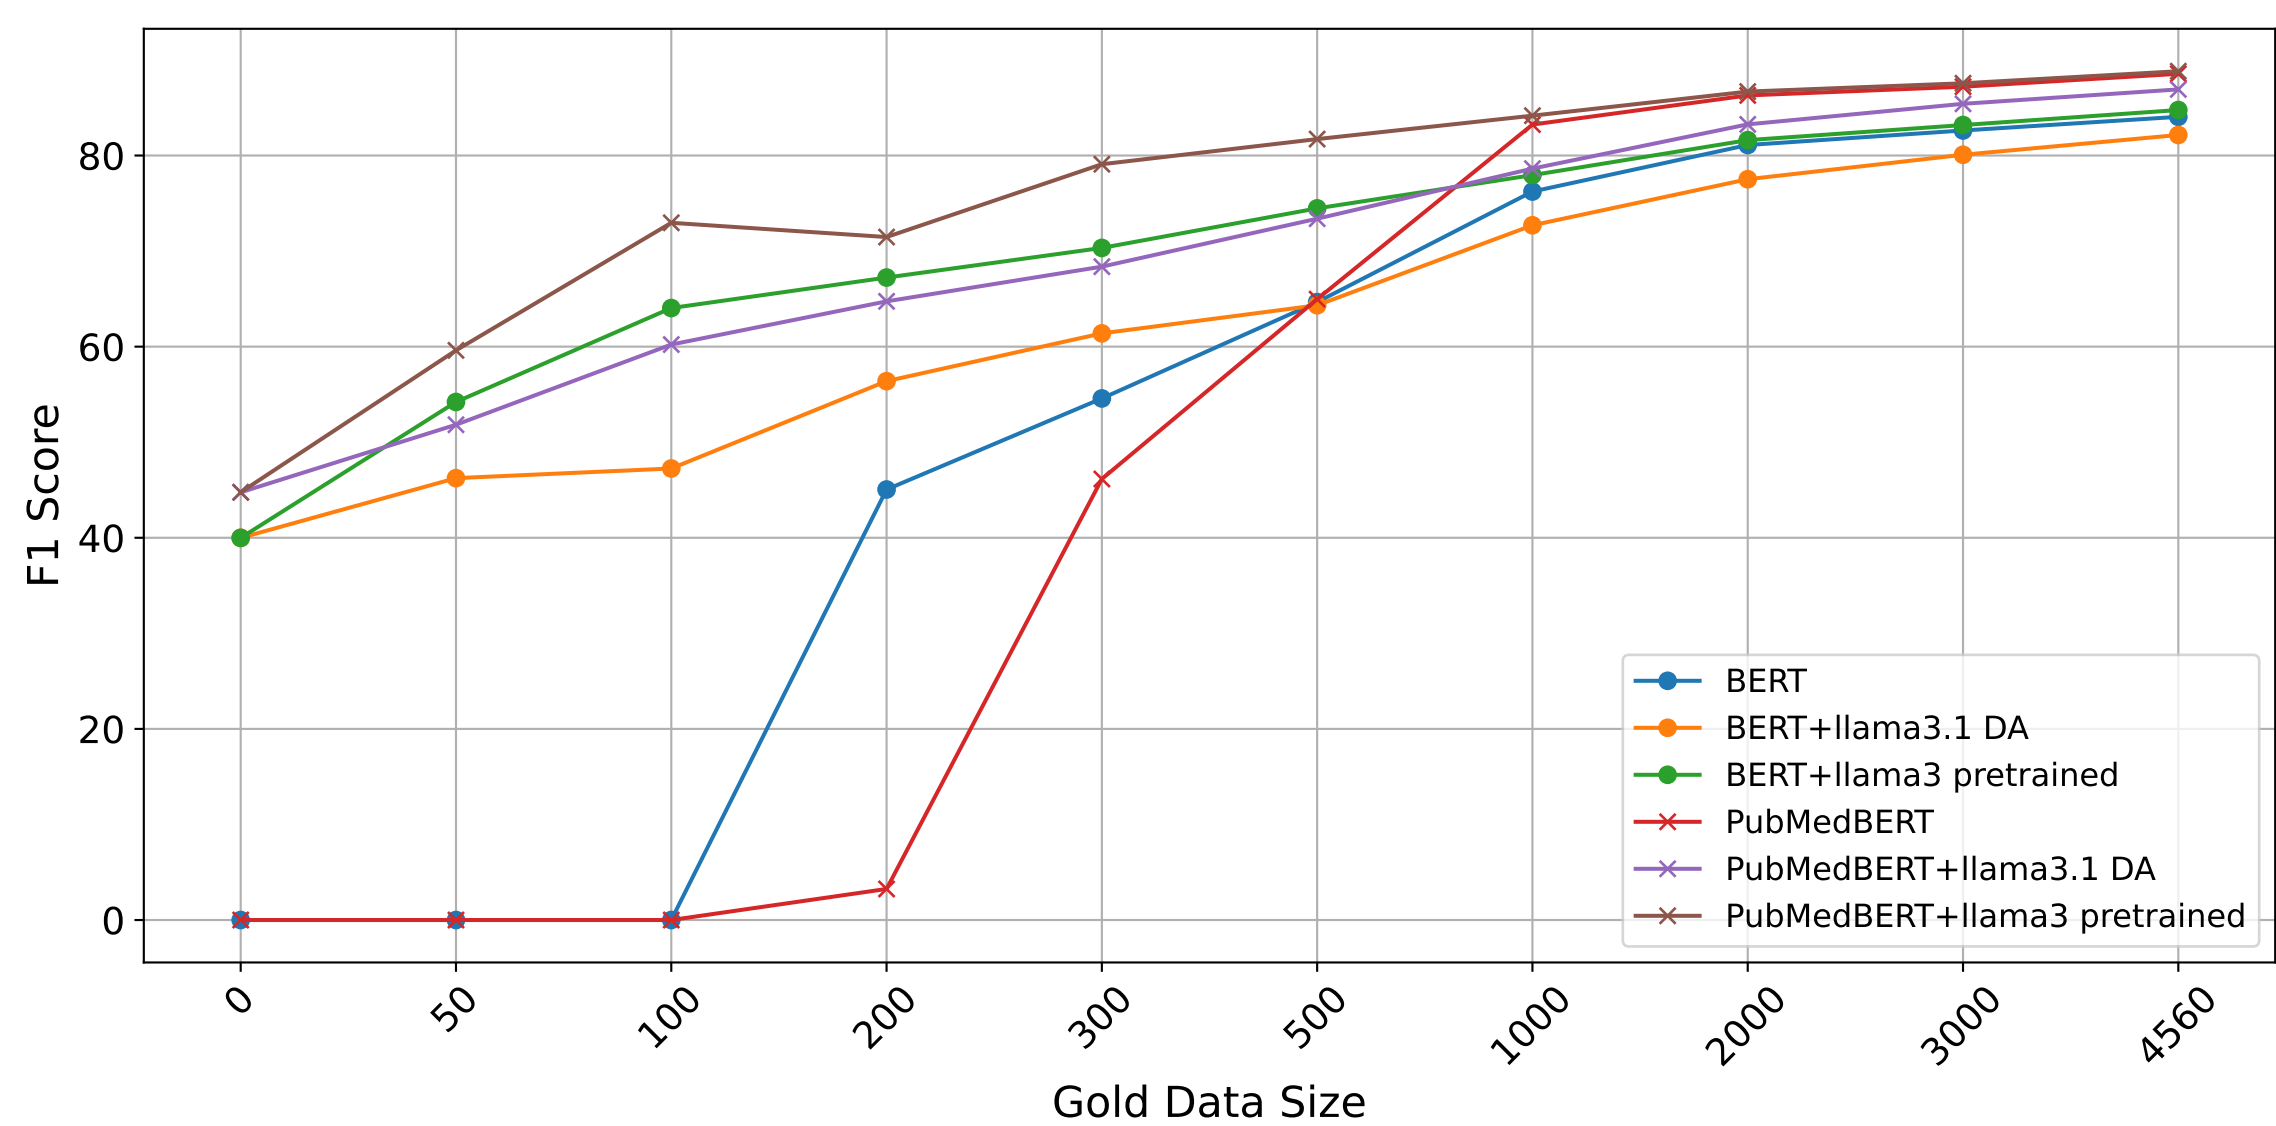

Supplement: SupplementaryMaterial [file BC5CDR_f1_scores_plot.pdf › figs/BC5CDR_f1_scores_plot.pdf]

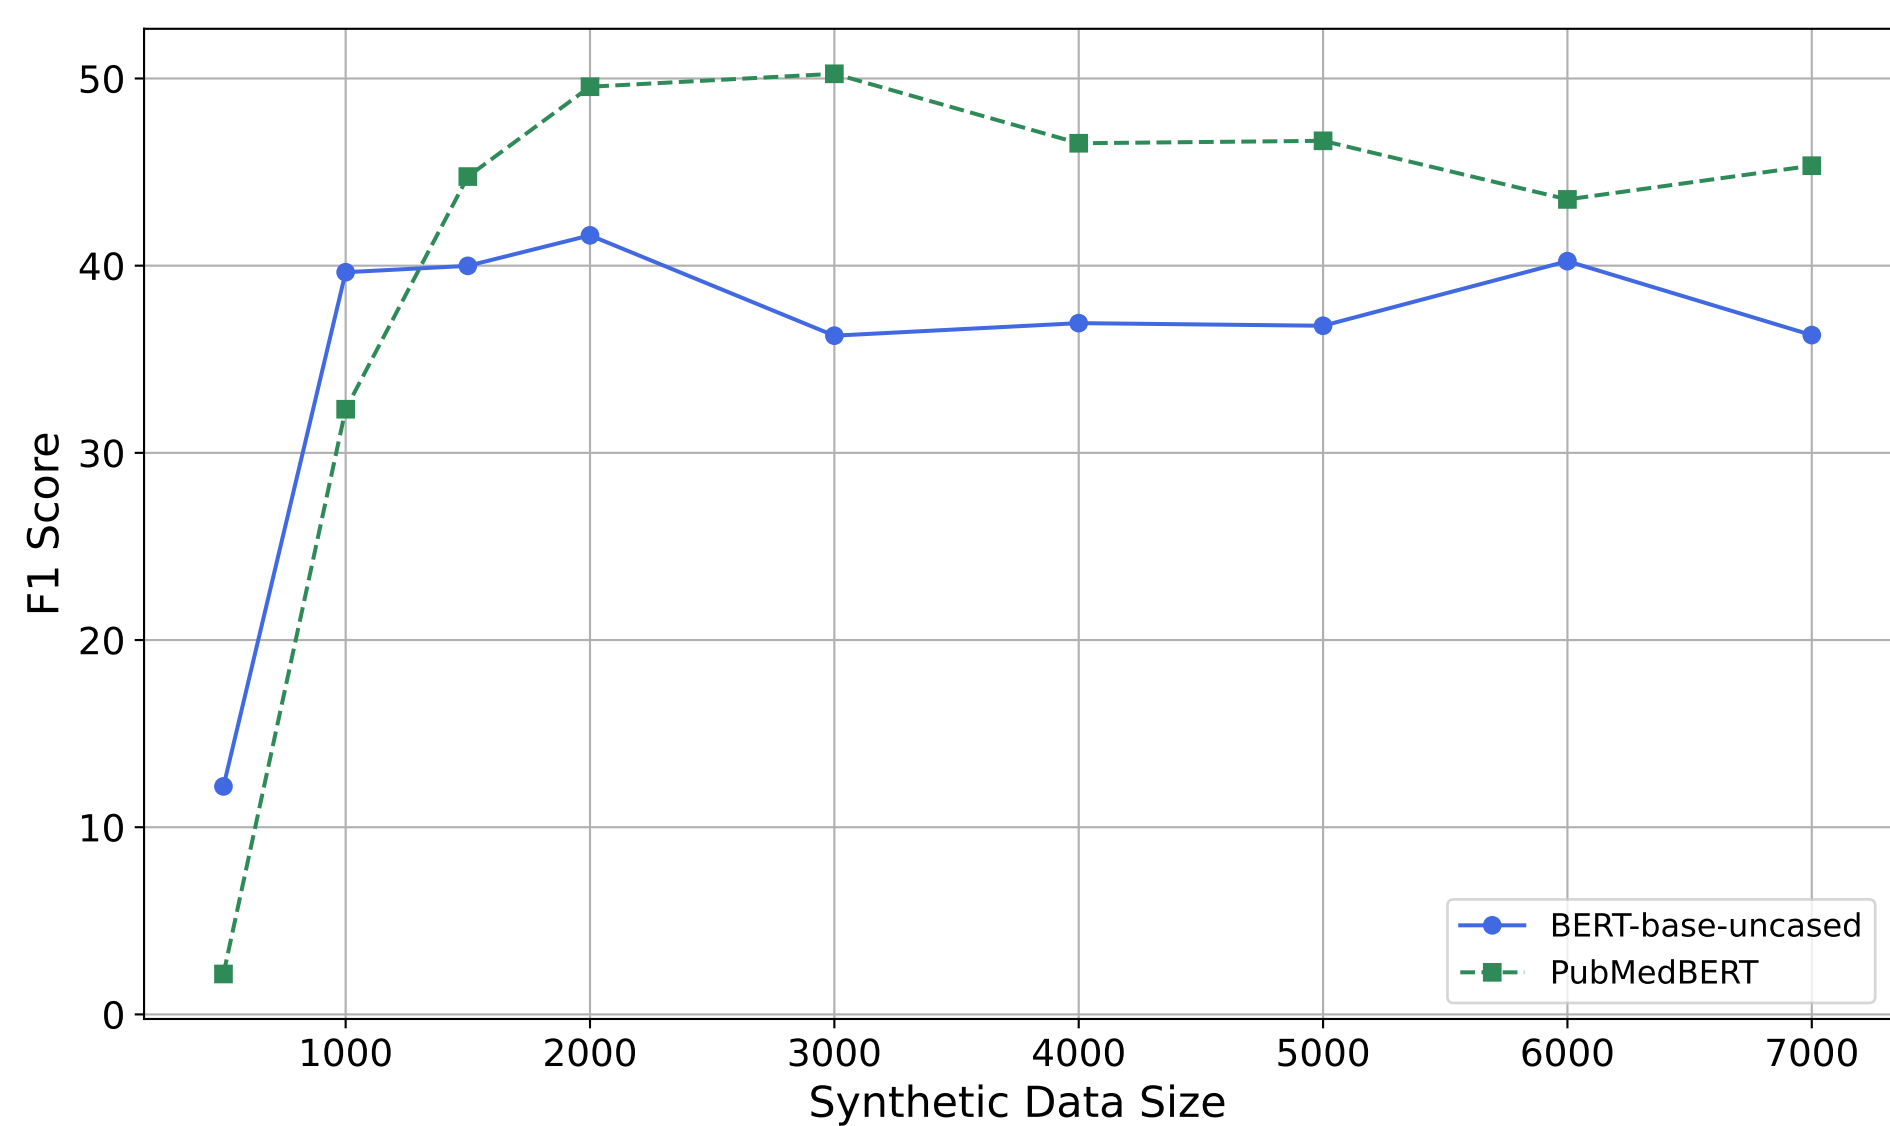

Supplement: SupplementaryMaterial [file BC5CDR_only_generated_f1_scores_plot.pdf › figs/BC5CDR_only_generated_f1_scores_plot.pdf]

F1 Score Comparison: Human-Annotated and Synthetic data (BC4CHEMD)

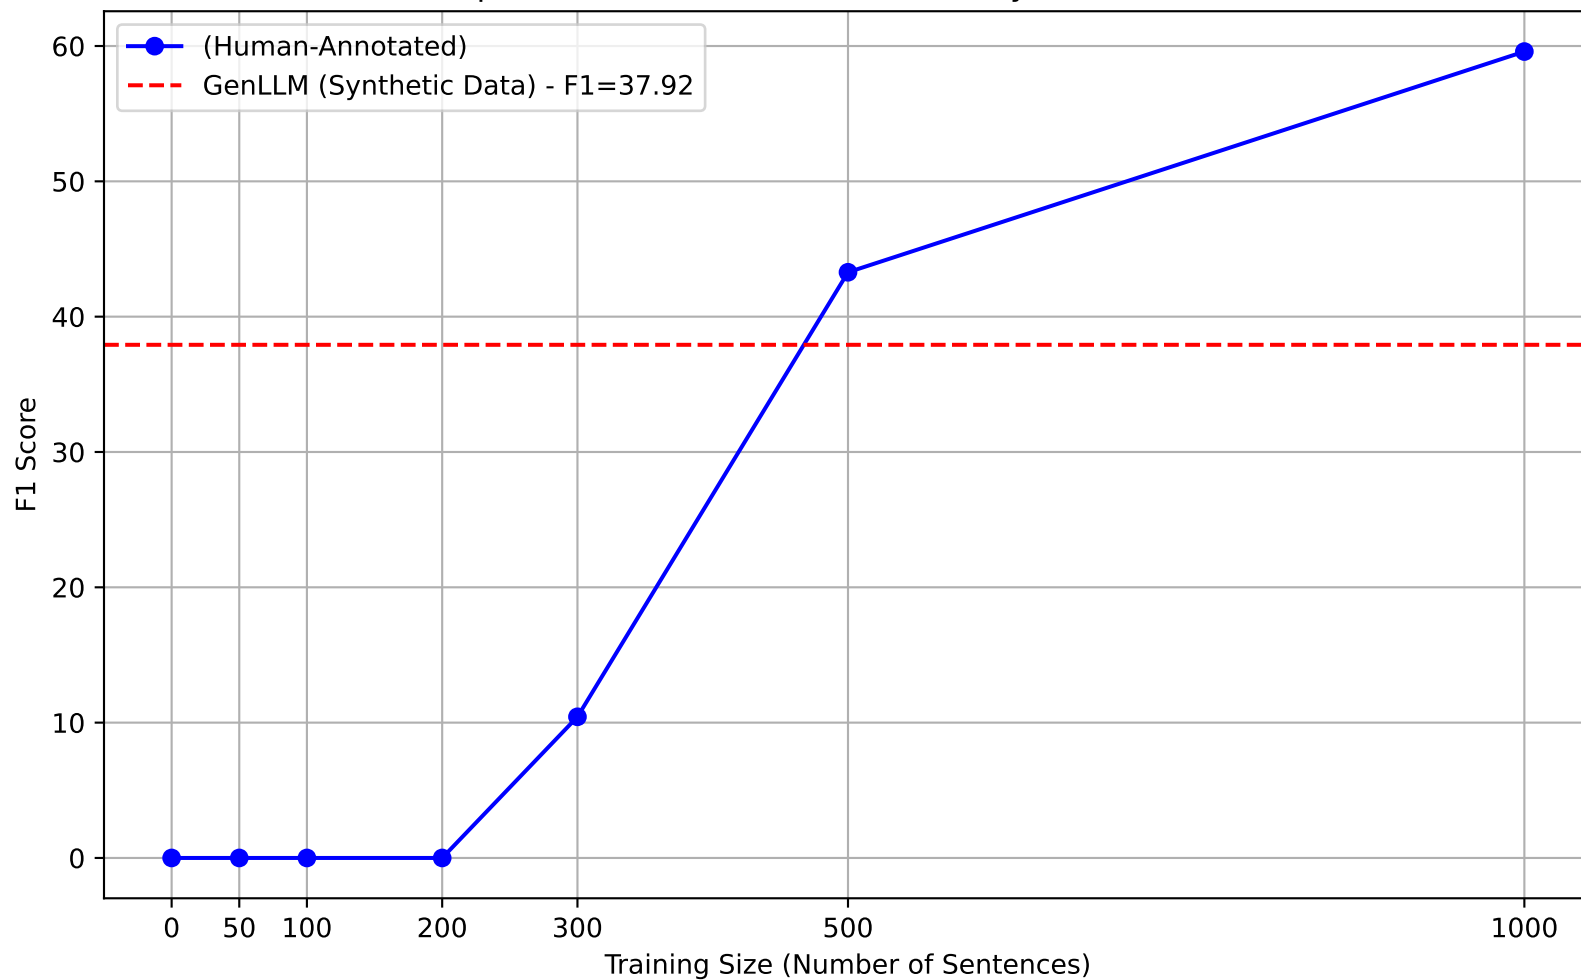

Supplement: SupplementaryMaterial [file genLLM_only_synthetic_BC4CHEMD.pdf › figs/genLLM_only_synthetic_BC4CHEMD.pdf]

F1 Score Comparison: Human-Annotated and Synthetic data (BC5CDR)

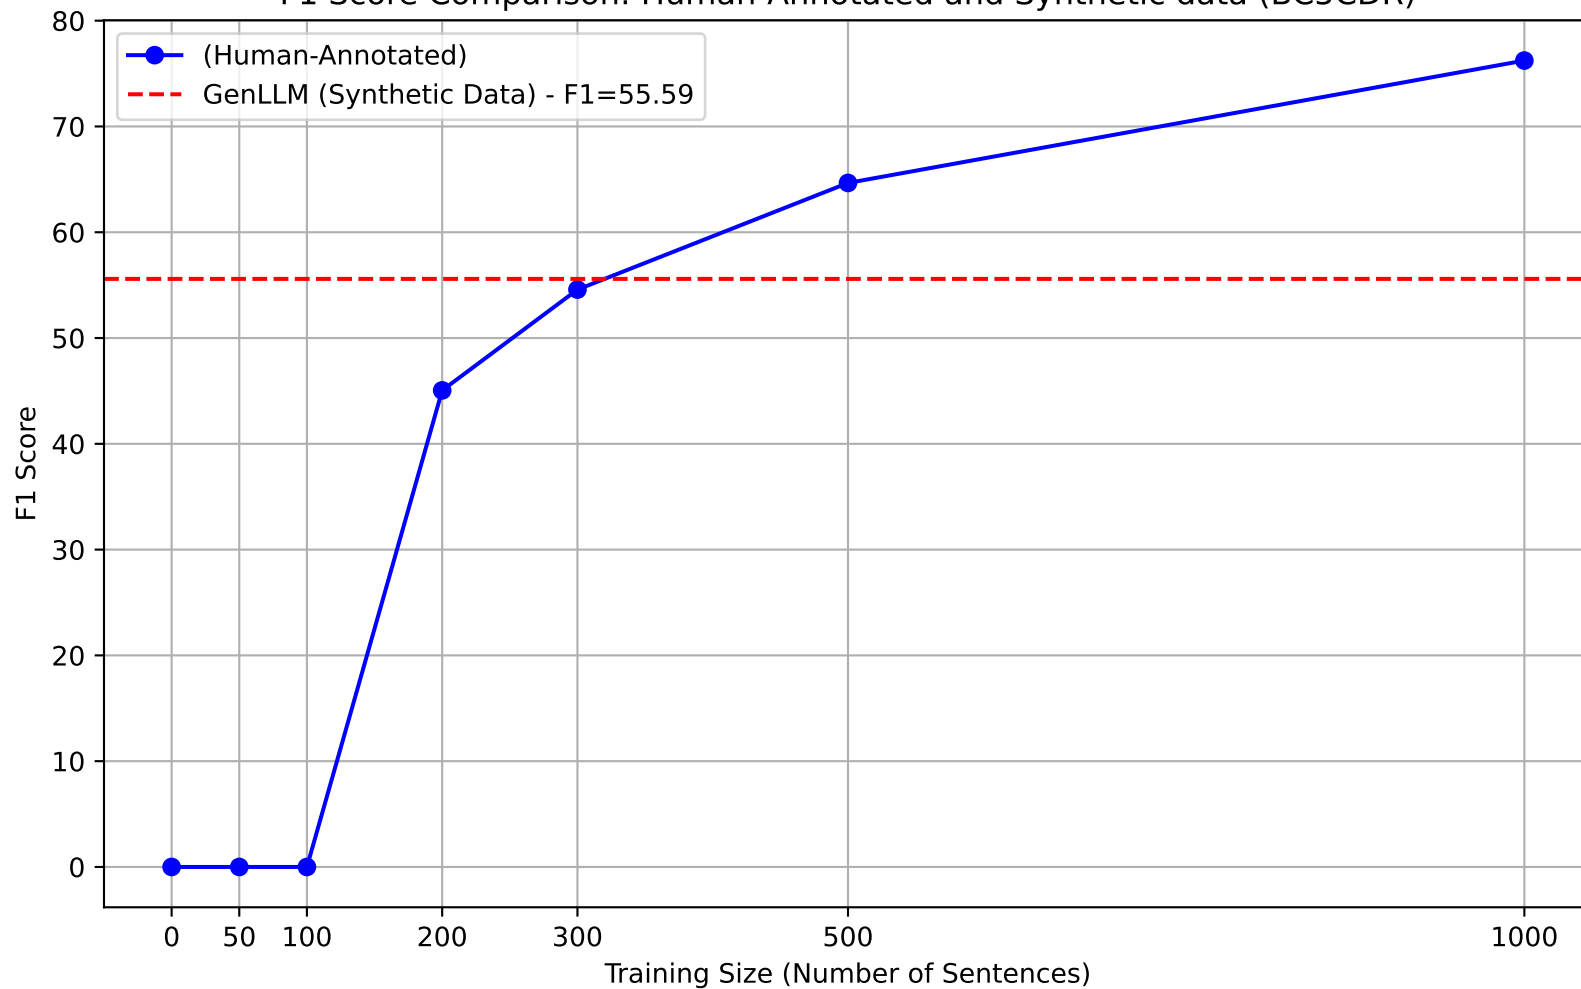

Supplement: SupplementaryMaterial [file genLLM_only_synthetic_BC5CDR.pdf › figs/genLLM_only_synthetic_BC5CDR.pdf]
